# Supplementary material for: Carbon dots using a household cleaning liquid as a dopant for iron detection in hydroponic systems
Source: Royal Society of Chemistry journal article supplement (doi:10.1039/d3ra01713c), 2023-01-01
Supplement: d3ra01713c1.pdf [file d3ra01713c1.pdf]

## Supporting Information

### Carbon Dots Using a Household Cleaning Liquid as a Dopant for Iron Detection in Hydroponic Systems

Robert G. Hjort<sup>†</sup>; Cicero C. Pola<sup>‡</sup>; Lisseth Casso-Hartmann; Diana C. Vanegas<sup>‡§</sup>; Eric

McLamore<sup>¶</sup>; Carmen L. Gomes<sup>†\*</sup>

<sup>†</sup> Department of Mechanical Engineering, Iowa State University, Ames, IA, 50011, United States.

<sup>‡</sup> Department of Environmental Engineering and Earth Sciences, Clemson University, Clemson, SC, 29634, United States.

<sup>§</sup> Interdisciplinary Group for Biotechnology Innovation and Ecosocial Change (BioNovo), Universidad del Valle, Cali 76001, Colombia

<sup>¶</sup> Agricultural Sciences Department, Clemson University, Clemson, SC, 29634, United States.

\*Corresponding author: [carmen@iastate.edu](mailto:carmen@iastate.edu)

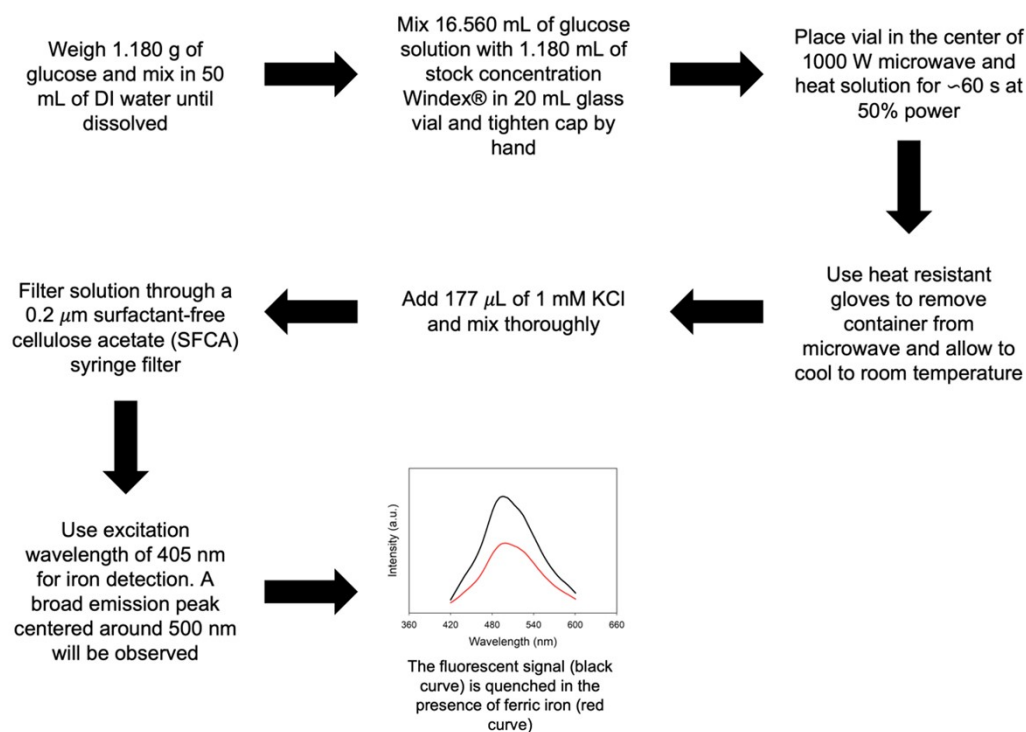

**Figure S1.** Flow-chart diagram detailing step-by-step production of the CDs and iron sensing.

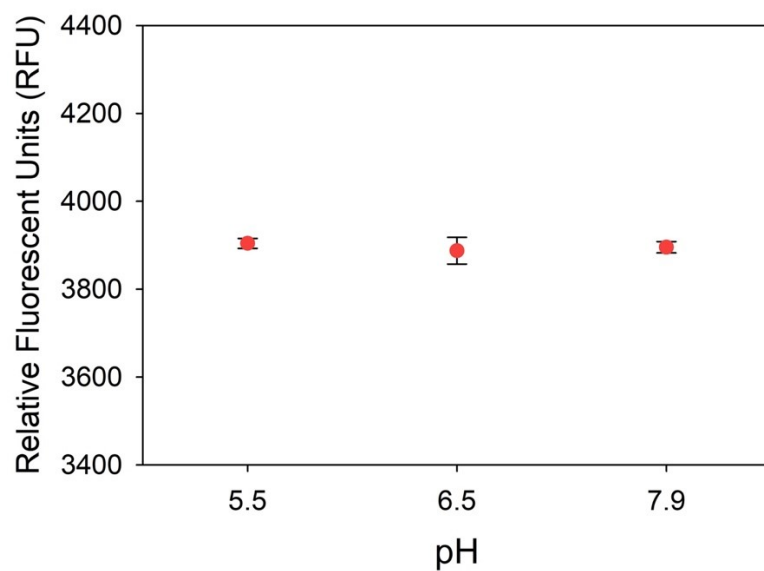

**Figure S2.** Effects of pH on fluorescent intensity of the CDs at 25 °C showing statistically non-significant ( $p > 0.05$ ) changes at pH levels of 5.5, 6.5, and 7.9. Data represents mean  $\pm$  standard deviation ( $n = 3$ ).

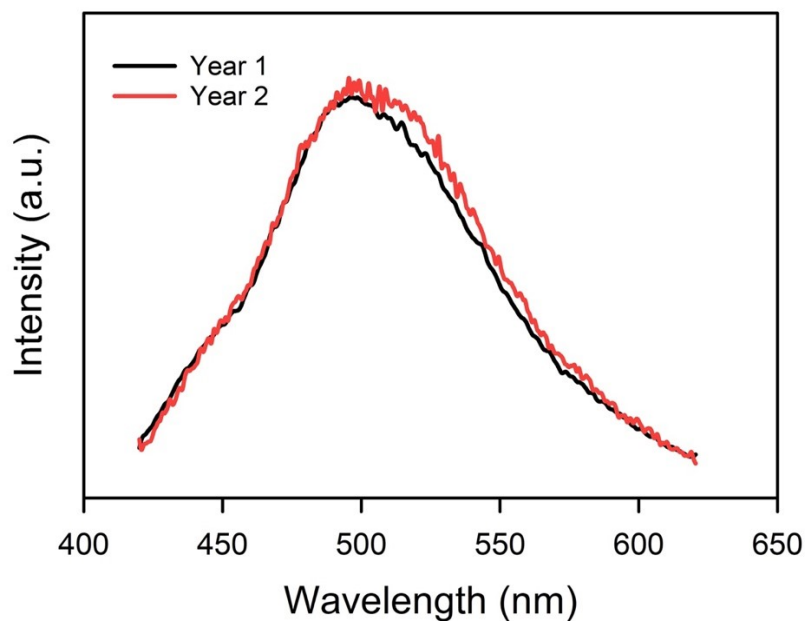

**Figure S3.** Fluorescent emission curves of the CDs after storage in a dark drawer for 1 year (black curve) and 2 years (red curve).

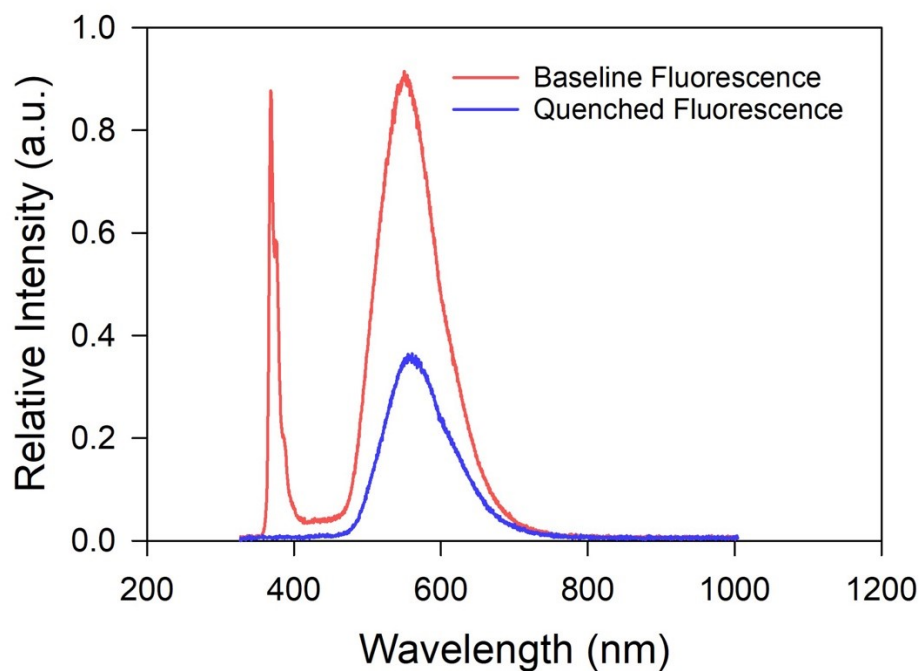

**Figure S4.** CDs under 405 nm excitation using a portable Vernier spectrophotometer and a P400-2-UV-VIS fiber optic cable from Ocean Optics.

**Table S1.** Comparison of the CDs produced in this study versus other published works on iron sensing with CDs.

| <b>Carbon Source</b> | <b>Production Method</b> | <b>LOD [<math>\mu</math>M]</b> | <b>Average Size [nm]</b> | <b>Quantum Yield [%]</b> | <b>Ref.</b> |
|----------------------|--------------------------|--------------------------------|--------------------------|--------------------------|-------------|
| Orange peel          | Hydrothermal             | 0.073                          | 2.60                     | 4.29                     | [1]         |
| Ginkgo biloba leaves | Hydrothermal             | 0.08                           | 2.60                     | 7.72                     | [1]         |
| Paulownia leaves     | Hydrothermal             | 0.1                            | 2.60                     | 4.74                     | [1]         |

|                 |                              |       |           |      |           |
|-----------------|------------------------------|-------|-----------|------|-----------|
| Magnolia flower | Hydrothermal                 | 0.088 | 2.60      | 8.13 | [1]       |
| Citric acid     | Solvothermal                 | 0.05  | 2.0 – 3.0 | 15   | [2]       |
| Orange peel     | Hydrothermal                 | 0.003 | 6.5       | 16.8 | [3]       |
| Wool keratin    | Hydrothermal                 | 0.113 | 2 – 6     | 8    | [4]       |
| Aspartic acid   | Microwave-assisted pyrolysis | 0.26  | 2.1       | 14   | [5]       |
| Citric acid     | Hydrothermal                 | 0.079 | 1.8       | N/A  | [6]       |
| Glycerol        | Thermal pyrolysis            | 0.016 | 6.1       | 45   | [7]       |
| D-glucose       | Microwave-assisted pyrolysis | 3.51  | 3.19      | 13   | This work |

---

## References

- [1] C. Wang, H. Shi, M. Yang, Y. Yan, E. Liu, Z. Ji, J. Fan, *Mater Res Bull* **2020**, 124.
- [2] K. M. Omer, D. I. Tofiq, A. Q. Hassan, *Microchimica Acta* **2018**, 185.
- [3] T. Chatzimitakos, A. Kasouni, L. Sygellou, A. Avgeropoulos, A. Troganis, C. Stalikas, *Talanta* **2017**, 175, 305.
- [4] Y. Song, N. Qi, K. Li, D. Cheng, D. Wang, Y. Li, *RSC Adv* **2022**, 12, 8108.
- [5] C. Zhang, Y. Cui, L. Song, X. Liu, Z. Hu, *Talanta* **2016**, 150, 54.
- [6] P. Lv, Y. Yao, H. Zhou, J. Zhang, Z. Pang, K. Ao, Y. Cai, Q. Wei, *Nanotechnology* **2017**, 28.
- [7] G. Gao, Y. W. Jiang, H. R. Jia, J. Yang, F. G. Wu, *Carbon N Y* **2018**, 134, 232.
